# Supplementary material for: Epidermal cell death in frogs with chytridiomycosis
Source: PeerJ. 2017 Feb 1;5:e2925. doi: 10.7717/peerj.2925 (PMC5291105; doi:10.7717/peerj.2925)
Supplement: Supplemental Information 1 [file peerj-05-2925-s001.xlsx]

## Sheet: LVA TUNEL Analysis
ID	Bd Status (1=bd-, 2 = Bd+)	tissue section	DAPI stain positive Cells	TUNEL Positive stained cells	% cells Apoptotic
3	1	Vent	305	7	0.0229508
7	1	Vent	178	2	0.011236
7	1	vent	260	2	0.00769231
18	2	Vent	156	7	0.0448718
18	2	vent	476	23	0.0483193
21	2	Vent	167	4	0.0239521
3	1	thigh	682	9	0.0131965
7	1	thigh	185	0	0
7	1	thigh	446	2	0.0044843
18	2	Thigh	164	2	0.0121951
18	2	thigh	383	7	0.0182768
21	2	thigh	353	18	0.0509915
3	1	Dorsum	216	2	0.00925926
7	1	dorsum	95	2	0.0210526
18	2	dorsum	140	4	0.0285714
18	2	dorsum	212	4	0.0188679
21	2	dorsum	304	4	0.0131579
21	2	dorsum	144	1	0.00694444

## Sheet: PSCO TUNEL Analysis
Tissue section	ID	ID	Bd Status (1=Bd-, 2 = Bd+, 3 = light infection)	DAPI stain positive Cells	TUNEL Positive stained cells	% cells Apoptotic
Dorsum	6J	1	1	300	5	0.0166667
Dorsum	2U	2	1	250	0	0
Dorsum	2S	3	1	500	4	0.008
Dorsum	1S	4	1	266	1	0.0037594
Dorsum	1J	5	1	93	0	0
Dorsum	9M	6	2	178	31	0.174157
Dorsum	6S	7	2	300	11	0.0366667
Dorsum	5C	8	2	126	46	0.365079
Dorsum	20J	9	2	400	14	0.035
Dorsum	20C	10	2	154	53	0.344156
Dorsum	18C	11	2	151	6	0.0397351
Dorsum	17J	12	2	161	16	0.0993789
Dorsum	17C	13	2	179	14	0.0782123
Dorsum	13J	14	2	350	6	0.0171429
Dorsum	10S	15	2	134	1	0.00746269
Dorsum	24U	16	3	302	55	0.182119
Dorsum	24S	17	3	294	15	0.0510204
Dorsum	24M	18	3	138	3	0.0217391
thigh	6J	1	1	300	1	0.00333333
thigh	2U	2	1	600	1	0.00166667
thigh	2S	3	1	300	1	0.00333333
thigh	1S	4	1	171	0	0
thigh	1J	5	1	210	28	0.133333
Thigh	9M	6	2	152	13	0.0855263
thigh	6S	7	2	102	18	0.176471
Thigh	5C	8	2	154	20	0.12987
thigh	20J	9	2	238	69	0.289916
thigh	20C	10	2	200	15	0.075
thigh	18C	11	2	122	35	0.286885
thigh	17J	12	2	154	37	0.24026
thigh	17C	13	2	174	38	0.218391
thigh	13J	14	2	254	36	0.141732
thigh	10S	15	2	312	62	0.198718
vent	6J	1	1	300	4	0.0133333
vent	2U	2	1	300	2	0.00666667
vent	2S	3	1	300	1	0.00333333
vent	1S	4	1	161	0	0
vent	6S	7	2	139	25	0.179856
vent	5C	8	2	121	48	0.396694
vent	20J	9	2	307	30	0.0977199
vent	20C	10	2	175	38	0.217143
vent	18C	11	2	174	22	0.126437
vent	17J	12	2	175	25	0.142857
vent	17C	13	2	169	22	0.130178
vent	13J	14	2	244	13	0.0532787
vent	10S	15	2	163	38	0.233129
vent	24U	16	3	186	26	0.139785
Vent	24S	17	3	274	6	0.0218978
vent	24M	18	3	222	22	0.0990991
