# Supplementary material for: Epidermal cell death in frogs with chytridiomycosis
Source: PeerJ. 2017 Feb 1;5:e2925. doi: 10.7717/peerj.2925 (PMC5291105; doi:10.7717/peerj.2925)
Supplement: Supplemental Information 2 [file peerj-05-2925-s002.xlsx]

## Sheet: L v alpina
ID	Bd Status (1=bd-, 2 = Bd+)	tissue section	DAPI Stain	Rhodamine Stain
3	1	Vent
7	1	Vent
7	1	vent
18	2	Vent
18	2	vent
21	2	Vent
3	1	thigh
7	1	thigh
7	1	thigh
18	2	Thigh
18	2	thigh
21	2	thigh
3	1	Dorsum
7	1	dorsum
18	2	dorsum
18	2	dorsum
21	2	dorsum
21	2	dorsum

## Sheet: P corroboree
Tissue section	ID	Bd Status (1=Bd-, 2 = Bd+, 3 = light infection)	DAPI Stain	Rhodamine Stain
Dorsum	9M	2
Thigh	9M	2
Dorsum	6S	2
thigh	6S	2
vent	6S	2
Dorsum	6J	1
thigh	6J	1
vent	6J	1
Dorsum	5C	2
Thigh	5C	2
vent	5C	2
Dorsum	2U	1
thigh	2U	1
vent	2U	1
Dorsum	2S	1
thigh	2S	1
vent	2S	1
Dorsum	24U	3
vent	24U	3
Dorsum	24S	3
Vent	24S	3
Dorsum	24M	3
vent	24M	3
Dorsum	20J	2
thigh	20J	2
vent	20J	2
Dorsum	20C	2
thigh	20C	2
vent	20C	2
Dorsum	1S	1
thigh	1S	1
vent	1S	1
Dorsum	1J	1
thigh	1J	1
Dorsum	18C	2
thigh	18C	2
vent	18C	2
Dorsum	17J	2
thigh	17J	2
vent	17J	2
Dorsum	17C	2
thigh	17C	2
vent	17C	2
Dorsum	13J	2
thigh	13J	2
vent	13J	2
Dorsum	10S	2
thigh	10S	2
vent	10S	2
