# Supplementary material for: Epidermal cell death in frogs with chytridiomycosis
Source: PeerJ. 2017 Feb 1;5:e2925. doi: 10.7717/peerj.2925 (PMC5291105; doi:10.7717/peerj.2925)
Supplement: Supplemental Information 3 — Raw data for the caspase 3/7 assay for L v alpina [file peerj-05-2925-s003.xlsx]

## Sheet: Combined data
sample id	Lva ID	Week	Status (0=Bd-, 1=Bd+, 2=bd cleared)	Caspase 1	Caspase 2	Caspase 3	average	average minus buffer	Caspase fixed for negatives	protein concentration	caspase/protein
5 wk 1	5	1	0	1563	1951	1630	1714.67	1518.33	1518.33	26.6521	56.9686
6 wk 1	6	1	0	673	261	149	361	164.667	164.667	34.8758	4.72152
7 wk 1	7	1	0	21997	20667		21332	21135.7	21135.7	1265.66	16.6994
14 wk 1	14	1	2	96	391	244	243.667	47.3333	47.3333	179.676	0.263437
17 wk 1	17	1	2	359	376	448	394.333	198	198	81.3212	2.43479
20 wk 1	20	1	2	541	507	808	618.667	422.333	422.333	64.6716	6.53043
24 wk 1	24	1	2	2619	2519	2626	2588	2391.67	2391.67	62.1457	38.4848
1 wk 2	1	2	0	2280	2418	2376	2358	2161.67	2161.67	85.4736	25.2905
2 wk 2	2	2	0	46574	42484	40259	43105.7	42909.3	42909.3	101.244	423.823
3 wk 2	3	2	0	20157	21361	21254	20924	20727.7	20727.7	119.923	172.841
4 wk 2	4	2	0	13949	13045	13050	13348	13151.7	13151.7	98.2632	133.841
5 wk 2	5	2	0	5606	5462	5303	5457	5260.67	5260.67	53.5213	98.2911
6 wk 2	6	2	0	525	473	369	455.667	259.333	259.333	32.8526	7.89384
7 wk 2	7	2	0	42723	41789	41073	41861.7	41665.3	41665.3	144.908	287.531
8 wk 2	8	2	0	372	416	437	408.333	212	212	24.1254	8.7874
11 wk 2	11	2	2	371	317	404	364	167.667	167.667	17.3672	9.65423
12 wk 2	12	2	2	154	240	172	188.667	-7.66667	0	38.5284	0
13 wk 2	13	2	2	3565	3655	3292	3504	3307.67	3307.67	52.4657	63.0444
14 wk 2	14	2	2	458	515	561	511.333	315	315	29.7381	10.5925
16 wk 2	16	2	1	221	204	335	253.333	57	57	54.057	1.05444
17 wk 2	17	2	2	243	180	245	222.667	26.3333	26.3333	30.6401	0.859439
18 wk 2	18	2	2	4420	4436	4460	4438.67	4242.33	4242.33	101.244	41.9022
19 wk 2	19	2	1	869	847	915	877	680.667	680.667	88.0661	7.72904
20 wk 2	20	2	2	338	293	637	422.667	226.333	226.333	67.9739	3.32971
21 wk 2	21	2	2	9088	8891	8836	8938.33	8742	8742	76.6037	114.12
22 wk 2	22	2	1	9477	10070	9605	9717.33	9521	9521	96.3251	98.8423
23 wk 2	23	2	2	188	176	226	196.667	0.333333	0.333333	36.6566	0.0090934
24 wk 2	24	2	2	1256	1483	1525	1421.33	1225	1225	43.4198	28.2129
26 wk 2	26	2	1	850	895	871	872	675.667	675.667	36.6566	18.4323
27 wk 2	27	2	2	294	330	478	367.333	171	171	58.5406	2.92105
5 wk 3	5	3	0	1717	1368	1352	1479	1282.67	1282.67	47.4918	27.0082
6 wk 3	6	3	0	597	452	878	642.333	446	446	90.7373	4.91529
7 wk 3	7	3	0	24100	20981	21913	22331.3	22135	22135	161.686	136.901
8 wk 3	8	3	0	784	611		697.5	501.167	501.167	31.8855	15.7177
11 wk 3	11	3	2	200	99	409	236	39.6667	39.6667	20.1657	1.96703
13 wk 3	13	3	2	7105	6622	6247	6658	6461.67	6461.67	73.6118	87.7804
14 wl 3	14	3	2	117	121	148	128.667	-67.6667	0	32.527	0
18 wk 3	18	3	2	220	283	319	274	77.6667	77.6667	44.7368	1.73608
20 wk 3	20	3	2	272	283	267	274	77.6667	77.6667	65.319	1.18904
24 wk 3	24	3	2	595	571	643	603	406.667	406.667	32.527	12.5024
1 wk 5	1	5	0	6100	6169	6636	6301.67	6105.33	6105.33	101.244	60.3034
2 wk 5	2	5	0	10289	10586	10519	10464.7	10268.3	10268.3	128.583	79.8577
3 wk 5	3	5	0	24251	24687	23537	24158.3	23962	23962	135.149	177.301
4 wk 5	4	5	0	5749	5811	6112	5890.67	5694.33	5694.33	100.24	56.8069
5 wk 5	5	5	0	6935	6520	7218	6891	6694.67	6694.67	52.4657	127.601
6 wk 5	6	5	0	739	788	1313	946.667	750.333	750.333	117.558	6.38266
7 wk 5	7	5	0	65793	67937	67876	67202	67005.7	67005.7	128.583	521.109
8 wk 5	8	5	0	668	648	697	671	474.667	474.667	33.1815	14.3052
11 wk 5	11	5	2	1692	1611	1717	1673.33	1477	1477	75.8445	19.4741
12 wk 5	12	5	2	1091	1172	1216	1159.67	963.333	963.333	112.967	8.5276
13 wk 5	13	5	2	15159	16032	237	10476	10279.7	10279.7	71.4447	143.883
16 wk 5	16	5	1	3140	2815	13880	6611.67	6415.33	6415.33	104.314	61.4999
14 wk 5	14	5	2	35421	35075	37568	36021.3	35825	35825	173.361	206.649
17 wk 5	17	5	2	879	875	705	819.667	623.333	623.333	77.3705	8.05647
18 wk 5	18	5	2	52726	56132	52294	53717.3	53521	53521	3053.07	17.5302
19 wk 5	19	5	1	37624	36945	37418	37329	37132.7	37132.7	88.9476	417.467
20 wk 5	20	5	2	1572	1563	1640	1591.67	1395.33	1395.33	217.993	6.40082
21 wk 5	21	5	2	54320	55808	55605	55244.3	55048	55048	92.5629	594.709
22 wk 5	22	5	1	59119	64101	58824	60681.3	60485	60485	131.17	461.119
23 wk 5	23	5	2	505	498	442	481.667	285.333	285.333	37.0235	7.70681
24 wk 5	24	5	2	3366	3355	3307	3342.67	3146.33	3146.33	93.4895	33.6544
26 wk 5	26	5	1	10497	10320	10891	10569.3	10373	10373	98.2632	105.563
27 wk 5	27	5	2	282	254	225	253.667	57.3333	57.3333	61.5298	0.931798
5 wk 7	5	7	0	11137	11671	11471	11426.3	11230	11230	57.386	195.692
6 wk 7	6	7	0	973	1229	959	1053.67	857.333	857.333	45.1846	18.974
7 wk 7	7	7	0	71739	82961	73363	76021	75824.7	75824.7	147.823	512.942
8 wk 7	8	7	0	760	659	566	661.667	465.333	465.333	46.5551	9.99532
11 wk 7	11	7	2	4139	4459	4172	4256.67	4060.33	4060.33	78.145	51.959
13 wk 7	13	7	2	28885	27791	27069	27915	27718.7	27718.7	88.0661	314.748
14 wk 7	14	7	2	133043	132199	123735	129659	129463	129463	153.831	841.589
20 wk 7	20	7	2	1596	1240	1213	1349.67	1153.33	1153.33	112.967	10.2095
24 wk 7	24	7	2	8732	9074	8846	8884	8687.67	8687.67	95.3705	91.0939
27 wk 7	27	7	2	23345	27316	25055	25238.7	25042.3	25042.3	127.309	196.706
	1	1	0	3455	3521	4332	3769.33	3761	118.888		31.6348
	2	1	0	52318	46087	45507	47970.7	47962.3	76.8471		624.127
	3	1	0	9273	9026	9259	9186	9177.67	68.9049		133.193
	4	1	0	837	809	790	812	803.667	668.78		1.20169
	12	1	2	4102	3955	3780	3945.67	3937.33	37.1345		106.029
	21	1	2	52	35	57	48	39.6667	7.09933		5.58738
	23	1	2	34	40	42	38.6667	30.3333	14.6916		2.06468
	27	1	2	140	181	171	164	155.667	150.588		1.03373
	16	1	1	16	16	16	16	7.66667	13.1732		0.581991
	19	1	1	1713	1683	1633	1676.33	1668	68.9049		24.2073
	22	1	1	8594	8318	8098	8336.67	8328.33	71.4566		116.551
	26	1	1	680	634	691	668.333	660	33.9075		19.4647
	1	3	0	1345	1355	1409	1369.67	1361.33	20.0126		68.0237
	2	3	0	4165	3891	3949	4001.67	3993.33	25.8138		154.698
	3	3	0	9160	8921	328	6136.33	6128	24.892		246.184
	4	3	0	230	277	6626	2377.67	2369.33	14.4268		164.231
	12	3	2	649	636	625	636.667	628.333	38.5097		16.3163
	21	3	2	2073	2035	2175	2094.33	2086	46.1883		45.1629
	23	3	2	48	55	143	82	73.6667	11.5989		6.35118
	27	3	2	58	47	1089	398	389.667	23.5706		16.5319
	16	3	1	95	82	199	125.333	117	35.8084		3.26739
	19	3	1	253	231	489	324.333	316	42.9484		7.35766
	22	3	1	623	653	731	669	660.667	72.7677		9.07911
	26	3	1	299	287	342	309.333	301	24.892		12.0923
	1	7	0	1359	1302	1361	1340.67	1332.33	33.2966		40.0141
	2	7	0	24851	24522	26568	25313.7	25305.3	43.7364		578.587
	3	7	0	31467	32570	31858	31965	31956.7	37.1345		860.566
	4	7	0	381	310	357	349.333	341	9.67061		35.2615
	12	7	2	52	56	47	51.6667	43.3333	9.15725		4.73214
	21	7	2	5042	5155	5065	5087.33	5079	35.8084		141.838
	23	7	2	1224	1320	1337	1293.67	1285.33	39.9358		32.185
	27	7	2	169999	157885	173075	166986	166978	55.3981		3014.15
	16	7	1	6758	6897	7206	6953.67	6945.33	52.4573		132.4
	19	7	1	56764	57547	58793	57701.3	57693	40.6685		1418.62
	22	7	1	17474	21117	16406	18332.3	18324	47.8988		382.556
	26	7	1	124	146	126	132	123.667	12.4739		9.91405
