# Supplementary material for: Epidermal cell death in frogs with chytridiomycosis
Source: PeerJ. 2017 Feb 1;5:e2925. doi: 10.7717/peerj.2925 (PMC5291105; doi:10.7717/peerj.2925)
Supplement: Supplemental Information 4 [file peerj-05-2925-s004.xlsx]

## Sheet: PSCO TUNEL
ID	Treatment	Date of swab	Zoospore equivalents in PCR	Zoospore equivalents per sample	Log base 10 of zoospore equivalents
1J	Control	2013-05-22	0	0	0
1J	Control	2013-06-26	0	0	0
1J	Control	2013-07-03	0	0	0
1S	Control	2013-05-22	0	0	0
1S	Control	2013-06-26	0	0	0
1S	Control	2013-07-03	0	0	0
2S	Control	2013-05-22	0	0	0
2S	Control	2013-06-26	0	0	0
2S	Control	2013-07-03	0	0	0
2U	Control	2013-05-22	0	0	0
2U	Control	2013-06-26	0	0	0
2U	Control	2013-07-03	0	0	0
6J	Control	2013-05-22	0	0	0
6J	Control	2013-06-26	0	0	0
6J	Control	2013-07-03	0	0	0
10S	Late Bd+	2013-04-27	451.81	75301.8	4.87681
10S	Late Bd+	2013-04-10	0.07	11.6667	1.10266
10S	Late Bd+	2013-04-17	47.23	7871.68	3.89612
10S	Late Bd+	2013-04-24	226.1	37683.4	4.57616
13J	Late Bd+	2013-05-01	3.21	535.001	2.72917
13J	Late Bd+	2013-05-15	105.81	17635	4.2464
13J	Late Bd+	2013-05-30	1952.28	325381	5.51239
13J	Late Bd+	2013-04-10	0	0	0
13J	Late Bd+	2013-04-17	0.77	128.334	2.11171
13J	Late Bd+	2013-04-24	3.03	505.001	2.70415
17C	Late Bd+	2013-05-04	263.47	43911.8	4.64259
17J	Late Bd+	2013-05-12	6277.09	1.04618e+06	6.01961
17C	Late Bd+	2013-04-10	0.13	21.6667	1.35539
17C	Late Bd+	2013-04-17	6.68	1113.34	3.04702
17C	Late Bd+	2013-04-24	12.07	2011.67	3.30377
17J	Late Bd+	2013-04-10	2.98	496.668	2.69694
17J	Late Bd+	2013-04-17	3.13	521.668	2.71823
17J	Late Bd+	2013-04-24	28.57	4761.68	3.67785
18C	Late Bd+	2013-05-01	23.02	3836.67	3.58407
18C	Late Bd+	2013-05-15	31.87	5311.68	3.72531
18C	Late Bd+	2013-05-29	399.18	66530.1	4.82302
18C	Late Bd+	2013-04-10	0.03	5.00001	0.778152
18C	Late Bd+	2013-04-17	0.62	103.334	2.01842
18C	Late Bd+	2013-04-24	0.09	15	1.20412
20C	Late Bd+	2013-05-01	6.28	1046.67	3.02022
20C	Late Bd+	2013-05-22	1132.41	188735	5.27586
20J	Late Bd+	2013-05-01	0.71	118.334	2.07676
20J	Late Bd+	2013-05-15	3.68	613.335	2.7884
20J	Late Bd+	2013-05-29	5.85	975.002	2.98945
20J	Late Bd+	2013-06-25	600.66	100110	5.00048
20C	Late Bd+	2013-04-10	0.1	16.6667	1.24716
20C	Late Bd+	2013-04-17	0.45	75.0002	1.88081
20C	Late Bd+	2013-04-24	4.72	786.668	2.89634
20J	Late Bd+	2013-04-10	0.02	3.33334	0.636823
20J	Late Bd+	2013-04-17	0.25	41.6668	1.63009
20J	Late Bd+	2013-04-24	0.24	40.0001	1.61278
5C	Late Bd+	2013-04-10	0.18	30.0001	1.49136
5C	Late Bd+	2013-04-17	83.03	13838.4	4.14112
5C	Late Bd+	2013-04-24	44.59	7431.68	3.87115
6S	Late Bd+	2013-05-13	1283.67	213945	5.33031
6S	Late Bd+	2013-04-10	0.57	95.0002	1.98227
6S	Late Bd+	2013-04-17	13.64	2273.34	3.35685
6S	Late Bd+	2013-04-24	24.57	4095.01	3.61236
9M	Late Bd+	2013-05-01	0.02	3.33334	0.636823
9M	Late Bd+	2013-05-15	4.37	728.335	2.86293
9M	Late Bd+	2013-05-29	8.03	1338.34	3.12689
9M	Late Bd+	2013-06-12	19.45	3241.67	3.5109
9M	Late Bd+	2013-06-27	617.7	102950	5.01263
9M	Late Bd+	2013-04-10	0.01	1.66667	0.425969
9M	Late Bd+	2013-04-17	0	0	0
9M	Late Bd+	2013-04-24	0.08	13.3334	1.15635
24M	Early Bd+	2013-04-10	0.12	20	1.32222
24M	Early Bd+	2013-04-17	0.53	88.3335	1.95101
24M	Early Bd+	2013-04-24	0.36	60.0001	1.78533
24S	Early Bd+	2013-04-10	0	0	0
24S	Early Bd+	2013-04-17	0.89	148.334	2.17416
24S	Early Bd+	2013-04-24	12.36	2060	3.31408
24U	Early Bd+	2013-04-10	0	0	0
24U	Early Bd+	2013-04-17	0.1	16.6667	1.24716
24U	Early Bd+	2013-04-24	0.36	60.0001	1.78533

## Sheet: LVA TUNEL
ID	Date	Weeks after inoculation	Zoospore equivalents per sample	Log base 10 of zoospore equivalents	Animals Used in TUNEL Assay
12	2014-04-23	2	0	0
12	2014-04-30	3	84.1683	1.93028
12	2014-05-07	4	1189.19	3.07562
12	2014-05-14	5	1851.7	3.26781
12	2014-05-21	6	788.349	2.89727
12	2014-05-28	7	5135.44	3.71066
12	2014-06-04	8	4739.43	3.67582
12	2014-06-11	Date of Death	12989.3	4.11362
16	2014-04-23	2	1085.02	3.03584
16	2014-04-30	3	1050.02	3.02161
16	2014-05-07	4	2689.72	3.42987
16	2014-05-14	5	2864.72	3.45723
16	2014-05-21	6	31565.8	4.49923
16	2014-05-27	Date of Death	89811.5	4.95334
16	2014-05-28	7	25784.8	4.41138
17	2014-04-23	2	2133.38	3.32927
17	2014-04-30	3	16689.2	4.22246
17	2014-05-07	4	21459.8	4.33165
17	2014-05-14	5	167082	5.22293
17	2014-05-18	Date of Death	207706	5.31745
18	2014-04-23	2	330.007	2.51984	x
18	2014-04-30	3	1462.36	3.16535	x
18	2014-05-07	4	6113.96	3.78639	x
18	2014-05-14	5	5566.94	3.74569	x
18	2014-05-21	6	43003.5	4.63351	x
18	2014-05-30	Date of Death	12721.3	4.10456	x
19	2014-04-23	2	135.003	2.13355
19	2014-04-30	3	538.677	2.73213
19	2014-05-07	4	1140.69	3.05755
19	2014-05-14	5	4096.92	3.61256
19	2014-05-21	6	9284.52	3.96781
19	2014-05-28	7	135826	5.13298
19	2014-06-04	8	124861	5.09643
19	2014-06-09	Date of Death	1948.71	3.28997
21	2014-04-23	2	275.005	2.44092	x
21	2014-04-30	3	810.683	2.90939	x
21	2014-05-07	4	1652.2	3.21833	x
21	2014-05-14	5	1643.87	3.21613	x
21	2014-05-21	6	1039.52	3.01725	x
21	2014-05-28	7	136.169	2.13726	x
21	2014-05-30	Date of Death	1102.36	3.04272	x

## Sheet: LVA Caspase
ID Number	Weeks after inoculation	Infection Status	Zoospore equivalents in PCR	Zoospore equivalents per sample	Log base 10 of zoospore equivalents
1	1	Control	0	0	0
2	1	Control	0	0	0
3	1	Control	0	0	0
4	1	Control	0	0	0
5	1	Control	0	0	0
6	1	Control	0	0	0
7	1	Control	0	0	0
8	1	Control	0	0	0
10	1	Cleared	0	0	0
11	1	Cleared	0	0	0
12	1	Cleared	0.61	101.669	2.01144
13	1	Cleared	0	0	0
14	1	Cleared	0	0	0
15	1	Cleared	0	0	0
16	1	Bd+	0	0	0
17	1	Cleared	0	0	0
18	1	Cleared	0	0	0
19	1	Bd+	0.27	45.0009	1.66277
20	1	Cleared	0	0	0
21	1	Cleared	0	0	0
22	1	Bd+	0	0	0
23	1	Cleared	0.09	15.0003	1.20413
24	1	Cleared	0.46	76.6682	1.89024
25	1	Cleared	0	0	0
26	1	Bd+	0.73	121.669	2.08874
27	1	Cleared	2.28	380.008	2.58093
10	2	Cleared	0	0	0
11	2	Cleared	0	0	0
12	2	Cleared	0.33	55.0011	1.7482
13	2	Cleared	0	0	0
14	2	Cleared	0	0	0
15	2	Cleared	0	0	0
16	2	Bd+	0.25	41.6675	1.6301
17	2	Cleared	0	0	0
18	2	Cleared	6.33	1055.02	3.02367
19	2	Bd+	1.83	305.006	2.48573
20	2	Cleared	0	0	0
21	2	Cleared	0.26	43.3342	1.64674
22	2	Bd+	0.22	36.6674	1.57597
23	2	Cleared	0	0	0
24	2	Cleared	0	0	0
25	2	Cleared	0	0	0
26	2	Bd+	0.14	23.3338	1.38621
27	2	Cleared	0	0	0
10	3	Cleared	0	0	0
11	3	Cleared	0	0	0
12	3	Cleared	0.33	55.0011	1.7482
13	3	Cleared	0	0	0
14	3	Cleared	0	0	0
15	3	Cleared	0	0	0
16	3	Bd+	26.05	4341.75	3.63777
17	3	Cleared	0	0	0
18	3	Cleared	4.85	808.349	2.90814
19	3	Bd+	2.36	393.341	2.59587
20	3	Cleared	0	0	0
21	3	Cleared	0.36	60.0012	1.78534
22	3	Bd+	2.25	375.007	2.5752
23	3	Cleared	0.31	51.6677	1.72154
24	3	Cleared	0	0	0
25	3	Cleared	0	0	0
26	3	Bd+	2.87	478.343	2.68065
27	3	Cleared	4.7	783.349	2.89451
10	4	Cleared	0	0	0
11	4	Cleared	0	0	0
12	4	Cleared	0	0	0
13	4	Cleared	0	0	0
14	4	Cleared	1.49	248.338	2.39679
15	4	Cleared	0	0	0
16	4	Bd+	29.45	4908.43	3.69103
17	4	Cleared	0	0	0
18	4	Cleared	1.06	176.67	2.24961
19	4	Bd+	12.59	2098.38	3.32209
20	4	Cleared	0	0	0
21	4	Cleared	3.57	595.012	2.77525
22	4	Bd+	2.1	350.007	2.54532
23	4	Cleared	0.29	48.3343	1.69315
24	4	Cleared	0	0	0
25	4	Cleared	0	0	0
26	4	Bd+	59.22	9870.2	3.99437
27	4	Cleared	16.56	2760.06	3.44108
10	5	Cleared	0	0	0
11	5	Cleared	0	0	0
12	5	Cleared	0.16	26.6672	1.44197
14	5	Cleared	138.21	23035.5	4.36242
15	5	Cleared	0	0	0
16	5	Bd+	135.11	22518.8	4.35256
17	5	Cleared	0	0	0
18	5	Cleared	15.76	2626.72	3.41958
19	5	Bd+	231.25	38542.4	4.58595
20	5	Cleared	0.01	1.6667	0.425974
21	5	Cleared	15	2500.05	3.39812
22	5	Bd+	5.84	973.353	2.98872
23	5	Cleared	0	0	0
24	5	Cleared	1.48	246.672	2.39388
25	5	Cleared	0	0	0
26	5	Bd+	86.93	14488.6	4.16106
27	5	Cleared	6.7	1116.69	3.04832
10	6	Cleared	0	0	0
11	6	Cleared	0	0	0
12	6	Cleared	0	0	0
13	6	Cleared	0	0	0
14	6	Cleared	392.34	65391.3	4.81553
15	6	Cleared	0	0	0
16	6	Bd+	80.37	13395.3	4.12698
17	6	Cleared	0.12	20.0004	1.32223
18	6	Cleared	45.2	7533.48	3.87705
19	6	Bd+	172.89	28815.6	4.45964
20	6	Cleared	0	0	0
21	6	Cleared	2.53	421.675	2.62601
22	6	Bd+	18.83	3138.4	3.49685
23	6	Cleared	0	0	0
24	6	Cleared	0	0	0
25	6	Cleared	0	0	0
26	6	Bd+	97.61	16268.7	4.21138
27	6	Cleared	1.77	295.006	2.4713
10	7	Cleared	0	0	0
11	7	Cleared	0.23	38.3341	1.59477
12	7	Cleared	0	0	0
13	7	Cleared	5.27	878.351	2.94416
15	7	Cleared	0	0	0
16	7	Bd+	27.31	4551.76	3.65827
17	7	Cleared	0.31	51.6677	1.72154
18	7	Cleared	16.63	2771.72	3.44291
19	7	Bd+	4.14	690.014	2.83949
20	7	Cleared	0.58	96.6686	1.98975
21	7	Cleared	0.81	135.003	2.13355
22	7	Bd+	20.17	3361.73	3.52669
23	7	Cleared	0	0	0
24	7	Cleared	0.28	46.6676	1.67822
25	7	Cleared	0	0	0
26	7	Bd+	365.72	60954.6	4.78501
27	7	Cleared	22.48	3746.74	3.57377
10	8	Cleared	0	0	0
11	8	Cleared	0	0	0
12	8	Cleared	0	0	0
13	8	Cleared	0	0	0
14	8	Cleared	2.32	386.674	2.58847
15	8	Cleared	0	0	0
16	8	Bd+	37.26	6210.12	3.79317
18	8	Cleared	5.89	981.686	2.99241
19	8	Bd+	56.33	9388.52	3.97264
20	8	Cleared	0	0	0
21	8	Cleared	0	0	0
22	8	Bd+	20.86	3476.74	3.5413
23	8	Cleared	0	0	0
24	8	Cleared	0	0	0
25	8	Cleared	0	0	0
26	8	Bd+	40.02	6670.13	3.8242
27	8	Cleared	3.53	588.345	2.77037
10	9	Cleared	0	0	0
11	9	Cleared	0	0	0
12	9	Cleared	0	0	0
13	9	Cleared	0	0	0
15	9	Cleared	0	0	0
18	9	Cleared	28.86	4810.1	3.68224
19	9	Bd+	2.31	385.008	2.5866
20	9	Cleared	0	0	0
21	9	Cleared	0	0	0
22	9	Bd+	2.33	388.341	2.59033
23	9	Cleared	0	0	0
24	9	Cleared	0	0	0
25	9	Cleared	0	0	0
26	9	Bd+	2734.41	455744	5.65872
27	9	Cleared	1.01	168.337	2.22875
10	10	Cleared	0	0	0
11	10	Cleared	0	0	0
12	10	Cleared	0	0	0
13	10	Cleared	0	0	0
15	10	Cleared	0	0	0
18	10	Cleared	4.16	693.347	2.84158
19	10	Bd+	468.33	78056.6	4.89241
20	10	Cleared	0	0	0
21	10	Cleared	0	0	0
22	10	Bd+	6.62	1103.36	3.04311
23	10	Cleared	0	0	0
24	10	Cleared	0.51	85.0017	1.93451
25	10	Cleared	0	0	0
27	10	Cleared	0	0	0
10	11	Cleared	0.46	76.6682	1.89024
11	11	Cleared	0	0	0
12	11	Cleared	0	0	0
13	11	Cleared	0	0	0
15	11	Cleared	0	0	0
18	11	Cleared	16.56	2760.06	3.44108
20	11	Cleared	0	0	0
21	11	Cleared	0	0	0
23	11	Cleared	0	0	0
24	11	Cleared	15.22	2536.72	3.40444
25	11	Cleared	0	0	0
27	11	Cleared	0	0	0
1	12	Control	0	0	0
2	12	Control	0	0	0
3	12	Control	0	0	0
5	12	Control	0	0	0
6	12	Control	0	0	0
7	12	Control	0	0	0
8	12	Control	0	0	0
10	12	Cleared	0	0	0
11	12	Cleared	0	0	0
12	12	Cleared	0	0	0
13	12	Cleared	0	0	0
15	12	Cleared	0	0	0
18	12	Cleared	14.27	2378.38	3.37646
20	12	Cleared	0	0	0
21	12	Cleared	0	0	0
23	12	Cleared	0	0	0
24	12	Cleared	14.94	2490.05	3.39638
25	12	Cleared	0	0	0
27	12	Cleared	0	0	0
